# Supplementary material for: DotMotif: an open-source tool for connectome subgraph isomorphism search and graph queries
Source: PubMed Central journal article supplement (PMC8219732; doi:10.1038/s41598-021-91025-5), 2021-06-22
Supplement: 41598_2021_91025_MOESM1_ESM.pdf [file 41598_2021_91025_MOESM1_ESM.pdf]

# DotMotif: An open-source tool for connectome subgraph isomorphism search and graph queries

**Jordan K. Matelsky<sup>1,\*</sup>, Elizabeth P. Reilly<sup>1</sup>, Erik C. Johnson<sup>1</sup>, Jennifer Stiso<sup>2,3</sup>, Danielle S. Bassett<sup>2,4,5,6,7,8</sup>, Brock A. Wester<sup>1</sup>, and William Gray-Roncal<sup>1,9,\*</sup>**

<sup>1</sup>The Johns Hopkins University Applied Physics Laboratory, Laurel MD 20723, USA

<sup>2</sup>Department of Bioengineering, School of Engineering and Applied Science, University of Pennsylvania, Philadelphia, PA 19104, USA

<sup>3</sup>Neuroscience Graduate Group, Perelman School of Medicine, University of Pennsylvania, Philadelphia, PA 19104, USA

<sup>4</sup>Department of Electrical and Systems Engineering, School of Engineering and Applied Science, University of Pennsylvania, Philadelphia, PA 19104, USA

<sup>5</sup>Department of Neurology, Perelman School of Medicine, University of Pennsylvania, Philadelphia, PA 19104 USA

<sup>6</sup>Department of Physics and Astronomy, College of Arts and Sciences, University of Pennsylvania, Philadelphia, PA 19104, USA

<sup>7</sup>Department of Psychiatry, Perelman School of Medicine, University of Pennsylvania, Philadelphia, PA 19104 USA

<sup>8</sup>Santa Fe Institute, Santa Fe, NM 87501 USA

<sup>9</sup>Johns Hopkins University, Department of Computer Science, Baltimore, MD 21218 USA

\*jordan.matelsky@jhuapl.edu, william.gray.roncal@jhuapl.edu

## Supplemental Materials

Code for the DotMotif Python library, the example snippets in this paper, and all data and code for the experiments run in *Results* are available online at [bosssdb.org/tools/dotmotif](http://bosssdb.org/tools/dotmotif).

Code and documentation for the improved subgraph isomorphism library is available online at [bosssdb.org/tools/grandiso](http://bosssdb.org/tools/grandiso), and the graph-library abstraction tool discussed in *Optimized interfaces for common graph libraries* is available at [bosssdb.org/tools/grand](http://bosssdb.org/tools/grand).
